# Supplementary material
Source: ML conference proceedings conference paper supplement (https://openaccess.thecvf.com/content/CVPR2025/html/Camiletto_FRAME_Floor-aligned_Representation_CVPR_2025_paper.html)
Supplement: Supplementary file 1 [file Camiletto_FRAME_Floor-aligned_Representation_CVPR_2025_supplemental.pdf]

# FRAME: Floor-aligned Representation for Avatar Motion from Egocentric Video

## Supplementary Material

### A. Model Details

#### A.1. Camera Model

In this project we use the camera model introduced by Kanala et Al. [3]. In the following paragraph, we summarize its main characteristics and describe how we employed it in this project.

For a normalized undistorted pixel  $(u, v)$ , let  $\theta$  represent the angle between the incoming ray and the optical axis, and  $r$  the radial distance in the image plane. By definition, in the pinhole model the following relation holds  $r = \tan(\theta)$ .

The distorted radial coordinate is given by:

$$r_d = \theta \cdot (1 + k_1\theta^2 + k_2\theta^4 + k_3\theta^6 + k_4\theta^8), \quad (1)$$

where  $k_1, k_2, k_3, k_4$  are specific to each the lens.

The relationship between distorted and undistorted coordinates is given by

$$u = \left(\frac{r}{r_d}\right) u_d, \quad v = \left(\frac{r}{r_d}\right) v_d \quad (2)$$

where the  $_d$  suffix stands for the distorted quantity.

##### A.1.1. Unprojection

We call unprojection the process of obtaining the 3D coordinates given a 2D pixel and its distance from the camera. To unproject a point, it is necessary to undistort it and subsequently obtain its 3D coordinates via the standard pinhole model. To undistort pixels we need to solve Equation 1 for  $\theta$ . Since it contains higher-order terms in  $\theta$ , direct inversion is intractable. Therefore, we follow OpenCV [1] in using a fixed point algorithm, starting with  $\theta_0 = r_d$  and iterating  $\theta_{n+1} = f(\theta_n)$ . In practice, we empirically observe that 5 steps are enough to find an accurate solution.

Once  $\theta$  converges, it's possible to compute  $r = \tan(\theta)$  and obtain the undistorted pixel coordinates. Given the undistorted pixels and their associated depth, we can obtain their 3D coordinates directly by inverting the pinhole model equation.

$$x' = \frac{u - c_x}{f_x}, \quad y' = \frac{v - c_y}{f_y} \quad (3)$$

Where  $f$  is the focal length and  $c$  the coordinates of the optical axis intersection with the image plane. The 3D coordinates  $(X, Y, Z)$  are then obtained by scaling the normalized coordinates by the corresponding depth value  $d$  at each pixel:

$$X = d \cdot x', \quad Y = d \cdot y', \quad Z = d \quad (4)$$

#### A.2. SoftArgmax

In order to obtain the  $u_k, v_k$  pixel coordinates of each joint  $k$  and their depth  $d_k$  we define the weight matrices  $\mathbf{Q}^x, \mathbf{Q}^y$  as

$$Q_{ij}^x = \frac{j}{W-1} \quad Q_{ij}^y = \frac{i}{H-1} \quad (5)$$

This allows us to perform a *soft-argmax* operation [4] to obtain the normalized 2D coordinates in a differentiable way.

$$\begin{aligned} u_k &= \sum_{i,j} (\mathbf{Q}^x \otimes \hat{\mathbf{H}}_k)_{ij}, \\ v_k &= \sum_{i,j} (\mathbf{Q}^y \otimes \hat{\mathbf{H}}_k)_{ij}, \end{aligned} \quad (6)$$

Where  $\otimes$  denotes the Hadamard product

### B. Metrics

**PA-MPJPE** We adopt the definition established in prior work [2]. PA-MPJPE quantifies the similarity between predicted and ground-truth 3D poses by computing the mean per-joint Euclidean distance after Procrustes alignment. This alignment removes pelvis translation and applies a similarity transform (rotation, translation, and scale) to minimize the discrepancy between poses.

**3D-PCK** 3D-PCK quantifies the percentage of predicted 3D keypoints within 10 cm of the ground-truth. For each joint, the Euclidean distance is calculated, and predictions below the threshold are deemed correct.

**Jitter** Jitter quantifies temporal smoothness by comparing frame-to-frame changes in predicted and ground-truth 3D joint positions. Although there are multiple ways to quantify it, we follow Physcap [6] and compute:

$$\frac{1}{N \cdot J} \sum_{n=1}^N \sum_{j=1}^J \left| \|\mathbf{v}_{n,\text{pred}}^j\| - \|\mathbf{v}_{n,\text{gt}}^j\| \right|$$

where  $N$  is the number of sequences,  $J$  is the number of joints,  $\mathbf{v}_{n,\text{pred}}$  and  $\mathbf{v}_{n,\text{gt}}$  are the predicted and ground-truth joint velocity at frame  $n$  for joint  $j$ , respectively.

**Non-penetration Percentage** This metric measures the fraction of all poses where all predicted 3D joints remain above the ground plane ( $y > 0$ )

**Mean Penetration Error (MPE)** MPE measures the average penetration depth of joints below the ground plane ( $y \leq 0$ ).

**Foot Sliding Velocity** This metric evaluates foot velocity discrepancies between prediction and ground truth when

feet are in contact with the ground. The sliding velocity error is computed as:

$$\frac{1}{N_c} \sum_{n=1}^{N_c} \sum_{j=1}^4 \|(\mathbf{v}_{n,\text{pred}}^j - \mathbf{v}_{n,\text{gt}}^j) \cdot \mathbf{1}_{xz}\| \quad \text{if joint } j \text{ is in contact}$$

where  $N_c$  is the number of contact frames, 4 is the number of feet joints, and  $\mathbf{1}_{xz}$  is a vector that projects the velocity onto the  $xz$ -plane.

## C. Data Collection

### C.1. Recording Rig

The recording rig is built on the Meta Quest 3 [5], chosen for its lightweight design and comfort, allowing for prolonged use. The Quest 3 includes an RGB outward-facing camera with high-quality passthrough capabilities, enabling users to interact naturally with their surroundings. The headset computes on-device 6D head pose data, streamed continuously via HTTP from the Quest 3 to a Raspberry Pi worn by the user, with a custom-built Unity [7] application handling data transmission.

**Egocentric Video Synchronization** The fisheye cameras mounted on the VR headset record at 30Hz as the studio camera array, but their clocks are not hardware synchronized. To address this, we use a simple visual cue: toggling the studio lights on and off at the beginning and end of each session. This provides a temporal reference, allowing us to align the fisheye camera frames with the studio’s frame of reference. Manual intra-frame adjustments are applied to account for any residual offsets or rolling shutter artifacts, ensuring tight alignment across all frames.

## References

- [1] G. Bradski. The OpenCV Library. *Dr. Dobb’s Journal of Software Tools*, 2000. 1
- [2] Angjoo Kanazawa, Michael J. Black, David W. Jacobs, and Jitendra Malik. End-to-end recovery of human shape and pose. In *Computer Vision and Pattern Recognition (CVPR)*, 2018. 1
- [3] J. Kannala and S.S. Brandt. A generic camera model and calibration method for conventional, wide-angle, and fish-eye lenses. *IEEE Transactions on Pattern Analysis and Machine Intelligence*, 28(8):1335–1340, 2006. 1
- [4] Diogo C Luvizon, Hedi Tabia, and David Picard. Human pose regression by combining indirect part detection and contextual information. *Computers & Graphics*, 85:15–22, 2019. 1
- [5] Meta. Meta quest 3, 2023. Accessed: 2024-10-09. 2
- [6] Soshi Shimada, Vladislav Golyanik, Weipeng Xu, and Christian Theobalt. Physcap: physically plausible monocular 3d motion capture in real time. *ACM Trans. Graph.*, 39(6), 2020. 1
- [7] Unity Technologies. *Unity: Real-time development platform*, 2024. Version 2024.1.0. 2
